# Supplementary material
Source: PubMed Central journal article supplement (PMC4711362)
Supplement: NIHMS749453-supplement-Supplemental_Tables.pdf [file NIHMS749453-supplement-Supplemental_Tables.pdf]

**TABLE S1: Sample characteristics and unadjusted odds ratios with 95% Confidence intervals (95% CIs) and two-sided p-values for the association with fertility intentions among 510 Sex Workers living in Vancouver**

| <b>Characteristic</b>                                   | <b>Yes<br/>n (%)<br/>140 (27.5%)</b> | <b>No<br/>n (%)<br/>370 (72.5%)</b> | <b>Odds Ratio<br/>(95% CI)</b> | <b>p - value</b> |
|---------------------------------------------------------|--------------------------------------|-------------------------------------|--------------------------------|------------------|
| <b>Age (Median, IQR)</b>                                | 29 (25.0-35.0)                       | 38.0 (31.0-44.0)                    | 0.89 (0.86– 0.91)              | <.001            |
| <b>Number of prior pregnancies (Median, IQR)</b>        | 2.0 (2.0-4.0)                        | 3.0 (2.0-5.0)                       | 0.92 (0.83-1.02)               | 0.103            |
| <b>Ethnicity</b>                                        |                                      |                                     |                                |                  |
| Aboriginal ancestry                                     | 49 (34.0)                            | 147 (40.1)                          | 0.87 (0.55 – 1.37)             | 0.541            |
| Visible minority (primarily Asian)                      | 44 (30.8)                            | 90 (24.5)                           | 1.27 (0.78 – 20.7)             | 0.334            |
| Caucasian                                               | 50 (34.9)                            | 130 (35.4)                          | REF                            |                  |
| <b>Migrant</b>                                          |                                      |                                     |                                |                  |
| yes                                                     | 43 (30.1)                            | 81 (37.9)                           | 2.27 (1.53 – 3.36)             | <.001            |
| no                                                      | 100 (69.9)                           | 286 (62.1)                          | REF                            |                  |
| <b>Education</b>                                        |                                      |                                     |                                |                  |
| High-school graduate                                    | 71 (51.7)                            | 183 (49.0)                          | 1.11 (0.76 – 1.64)             | 0.584            |
| Less than high-school graduate                          | 69 (48.3)                            | 187 (51.0)                          | REF                            |                  |
| <b>Homeless*</b>                                        |                                      |                                     |                                |                  |
| yes                                                     | 50 (35.0)                            | 113 (30.8)                          | 1.21 (0.80 – 1.82)             | 0.364            |
| no                                                      | 93 (65.0)                            | 257 (69.2)                          | REF                            |                  |
| <b>HIV</b>                                              |                                      |                                     |                                |                  |
| positive                                                | 8 (6.2)                              | 48 (14.3)                           | 0.40 (0.18 – 0.86)             | 0.016            |
| negative                                                | 121 (93.8)                           | 287 (85.7)                          | REF                            |                  |
| <b>Place of servicing clients *</b>                     |                                      |                                     |                                |                  |
| Formal indoor (e.g., brothel, massage parlour)          | 28 (19.6)                            | 95 (25.9)                           | 1.95 (1.17 – 3.26)             | 0.011            |
| Informal indoor (e.g., hotel, client’s place)           | 64 (44.8)                            | 169 (46.1)                          | 0.92 (0.52 – 1.62)             | 0.759            |
| Outdoor/public space (e.g., car, bathroom, parking lot) | 51 (35.7)                            | 101 (27.5)                          | REF                            |                  |
| <b>Bad date*</b>                                        |                                      |                                     |                                |                  |
| yes                                                     | 61 (42.7)                            | 134 (36.5)                          | 1.29 (0.87 – 1.92)             | 0.200            |
| no                                                      | 82 (57.3)                            | 236 (63.5)                          | REF                            |                  |
| <b>Inconsistent condom use by clients*</b>              |                                      |                                     |                                |                  |
| yes                                                     | 35 (24.5)                            | 48 (13.1)                           | 2.15 (1.32– 3.51)              | 0.002            |
| no                                                      | 108 (75.5)                           | 319 (86.9)                          | REF                            |                  |
| <b>Have intimate male partner*</b>                      |                                      |                                     |                                |                  |
| yes                                                     | 83 (58.0)                            | 139 (37.9)                          | 2.27 (1.53 – 3.36)             | <0.001           |
| no                                                      | 60 (42.0)                            | 228 (62.1)                          | REF                            |                  |

|                                    |            |            |                    |        |
|------------------------------------|------------|------------|--------------------|--------|
| <b>Have intimate male partner*</b> |            |            |                    |        |
| yes                                | 83 (58.0)  | 139 (37.9) | 2.27 (1.53 – 3.36) | <0.001 |
| no                                 | 60 (42.0)  | 228 (62.1) | REF                |        |
| <b>Intimate partner violence*</b>  |            |            |                    |        |
| yes                                | 40 (28.0)  | 61 (16.6)  | 1.95 (1.23 – 3.08) | 0.004  |
| no                                 | 103 (72.0) | 306 (83.4) | REF                |        |
| <b>Injection drug use†</b>         |            |            |                    |        |
| yes                                | 48 (33.6)  | 149 (40.6) | 0.74 (0.49 – 1.11) | 0.143  |
| no                                 | 95 (66.4)  | 218 (59.4) | REF                |        |
| <b>Ever pregnant</b>               |            |            |                    |        |
| yes                                | 110 (76.9) | 289 (78.7) | 0.90 (0.57 – 1.43) | 0.654  |
| no                                 | 33 (23.1)  | 78 (21.3)  | REF                |        |

---

\* Last 6 months

† Ever

---

**TABLE S2. Bivariate and multivariable associations and 95% Confidence Intervals (95%CI) for the correlates of pregnancy intentions among 510 Female Sex Workers living in Vancouver**

| Characteristic                                                              | Odds Ratio (OR)           |                         |
|-----------------------------------------------------------------------------|---------------------------|-------------------------|
|                                                                             | Unadjusted OR<br>(95% CI) | Adjusted OR<br>(95% CI) |
| <b>Individual-level factors</b>                                             |                           |                         |
| Age                                                                         | 0.89 (0.86-0.91)          | 0.89 (0.86 – 0.92)      |
| Ethnicity                                                                   |                           |                         |
| Aboriginal vs. Caucasian                                                    | 0.87 (0.55 – 1.37)        | –                       |
| Visible minority vs. Caucasian                                              | 1.27 (0.78 – 1.76)        | –                       |
| High-school graduate                                                        | 1.11 (0.76 – 1.64)        | –                       |
| Homeless*                                                                   | 1.21 (0.80 – 1.82)        | –                       |
| HIV positive                                                                | 0.40 (0.18– 0.86)         |                         |
| Ever pregnant                                                               | 0.90 (0.57 – 1.43)        | –                       |
| Used injection drugs†                                                       | 0.74 (0.49 – 1.11)        | –                       |
| <b>Interpersonal and Structural factors</b>                                 |                           |                         |
| Physical/Sexual violence by client*                                         | 1.29 (1.32 – 3.51)        | –                       |
| Inconsistent condom use by clients*                                         | 2.15 (1.32– 3.08)         | 1.95 (1.11 – 3.43)      |
| Have male intimate partner*                                                 | 2.27 (1.53 – 3.36)        | –                       |
| Inconsistent condom use by intimate male partner*                           | 2.23 (1.50 – 3.31)        | –                       |
| Intimate partner violence*                                                  | 1.95 (1.23 – 3.08)        | 1.64 (0.87 – 2.78)      |
| <i>Place of servicing clients *</i>                                         |                           |                         |
| Formal indoor (e.g., brothel, massage parlour) versus. Outdoor/public space | 1.33 (0.96 – 2.08)        | 1.95 (1.17 – 3.26)      |
| Informal indoor (e.g., hotel, client's place) versus. Outdoor/public space  | 0.78 (0.47 – 1.30)        | 0.91 (0.52 – 1.62)      |
| * Last 6 months                                                             |                           |                         |
| † Ever                                                                      |                           |                         |
